# Supplementary material for: A one-pot gold seed-assisted synthesis of gold/platinum wire nanoassemblies and their enhanced electrocatalytic activity for the oxidation of oxalic acid
Source: Royal Society of Chemistry journal article supplement (doi:10.1039/c5nr08150e), 2015-12-28
Supplement: c5nr08150e1.pdf [file c5nr08150e1.pdf]

Electronic Supplementary Information

**One pot, gold seed-assisted synthesis of gold/platinum wire  
nanoassemblies and their enhanced electrocatalytic activity for the  
oxalic acid oxidation**

Juan Bai, Chun-Long Fang, Zong-Huai Liu, and Yu Chen\*

Key Laboratory of Macromolecular Science of Shaanxi Province, School of Materials  
Science and Engineering, Shaanxi Normal University, Xi'an 710062, PR China.

\* Corresponding author

E-mail addresses: ndchenyu@gmail.com (Y. Chen)

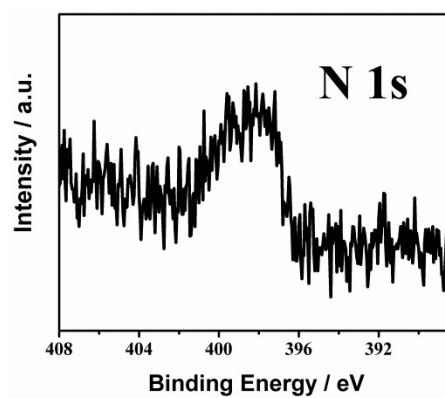

**Figure S1.** N1s XPS spectrum of Au<sub>1</sub>/Pt<sub>6</sub> wire nanoassemblies.

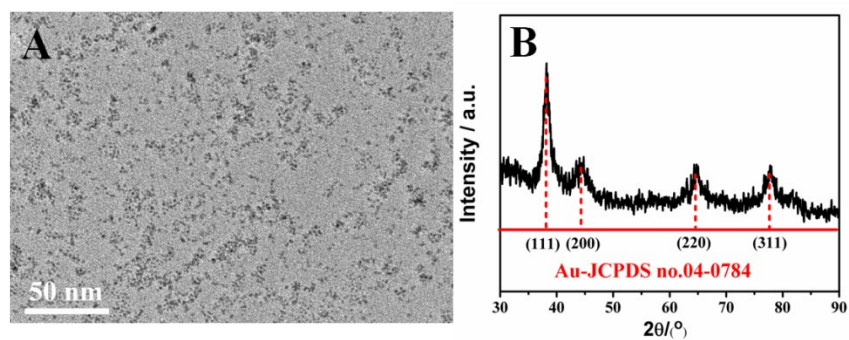

**Figure S2.** (A) TEM image and (B) XRD pattern of the ultrafine Au nanoparticles obtained by mixing HAuCl<sub>4</sub> and K<sub>2</sub>PtCl<sub>4</sub> solution.
